Charles D. Collard, M.D., Editor  
 Alan Jay Schwartz, M.D., M.S. Ed., Associate Editor

## High-frequency Percussive Ventilation for Severe Inhalation Injury

Kenneth N. Hiller, M.D., Christopher K. Morgan, M.D.

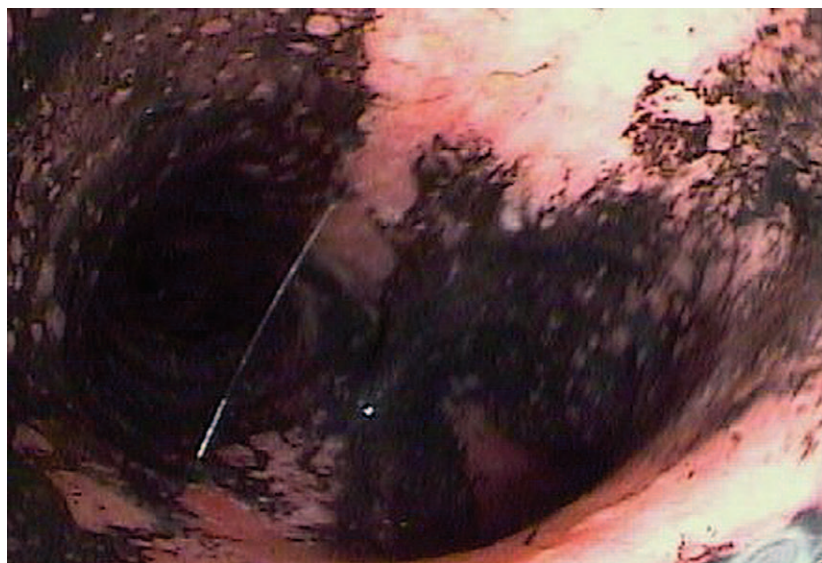

A HEALTHY 26-yr-old with singed nares, carbonaceous tracheal secretions, and respiratory distress was intubated following a house fire. Bronchoscopy (fig.) revealed soot throughout the tracheobronchial tree consistent with severe inhalational injury. Despite ARDSNet goal-directed conventional mechanical ventilation, adequate muscle relaxation, and aerosolized pharmacotherapy of albuterol, acetylcysteine, and heparin, worsening oxygenation and ventilation ensued. High-frequency percussive ventilation (HFPV) was initiated to aid oxygenation, mechanics, and secretion clearance. Nine days later, the patient had adequate oxygenation with negligible secretions. Conventional ventilation was reinstituted with extubation shortly thereafter.

HFPV has been associated with attenuated ventilator-induced lung injury, improved oxygenation at lower peak airway pressures, and hemodynamic stability among patients with inhalation injury.<sup>1</sup> HFPV produces small, high-frequency gas pulses that accumulate to form low-frequency tidal volume breaths in the apneic, motionless lung. This continuous laminar oxygen flow results in a *distal-to-proximal* gas concentration gradient beginning at the alveolar–arterial interface. Consequently, conventional precepts of dead space and effective alveolar ventilation have limited application to high-frequency ventilation in which diffusion becomes the principle means of gas exchange.<sup>2</sup> Because inhalation injury is predominantly a conducting and peripheral airway insult, HFPV may preferentially benefit these specific patients. A recent prospective, randomized controlled clinical trial of burn patients with inhalation injury compared conventional low tidal volume ventilation with HFPV. The study reported similar ventilator-free days for both groups; however, a statistically greater proportion (29% *vs.* 6%) of the conventional ventilation group failed to meet oxygenation or ventilation goals and required an alternate rescue modality.<sup>3</sup>

### Competing Interests

The authors declare no competing interests.

### Correspondence

Address correspondence to Dr. Hiller: kenneth.n.hiller@uth.tmc.edu

### References

1. Salim A, Martin M: High-frequency percussive ventilation. *Crit Care Med* 2005; 33:S241–5
2. Allan PF, Osborn EC, Chung KK, Wanek SM: High-frequency percussive ventilation revisited. *J Burn Care Res* 2010; 31:510–20
3. Chung KK, Wolf SE, Renz EM, Allan PF, Aden JK, Merrill GA, Shelhamer MC, King BT, White CE, Bell DG, Schwacha MG, Wanek SM, Wade CE, Holcomb JB, Blackburn LH, Cancio LC: High-frequency percussive ventilation and low tidal volume ventilation in burns: A randomized controlled trial. *Crit Care Med* 2010; 38:1970–7

From the Department of Anesthesiology, Post Anesthesia Care Unit, University of Texas Health Science Center at Houston Medical School, Houston, Texas (K.N.H.).

Copyright © 2013, the American Society of Anesthesiologists, Inc. Lippincott Williams & Wilkins. *Anesthesiology* 2014; 120:998
